# Supplementary material for: Alternative transcription start sites contribute to acute-stress-induced transcriptome response in human skeletal muscle
Source: PubMed Central journal article supplement (PMC9308330; doi:10.1186/s40246-022-00399-8), 2022-07-22
Supplement: 40246_2022_399_MOESM1_ESM.pdf [file 40246_2022_399_MOESM1_ESM.pdf]

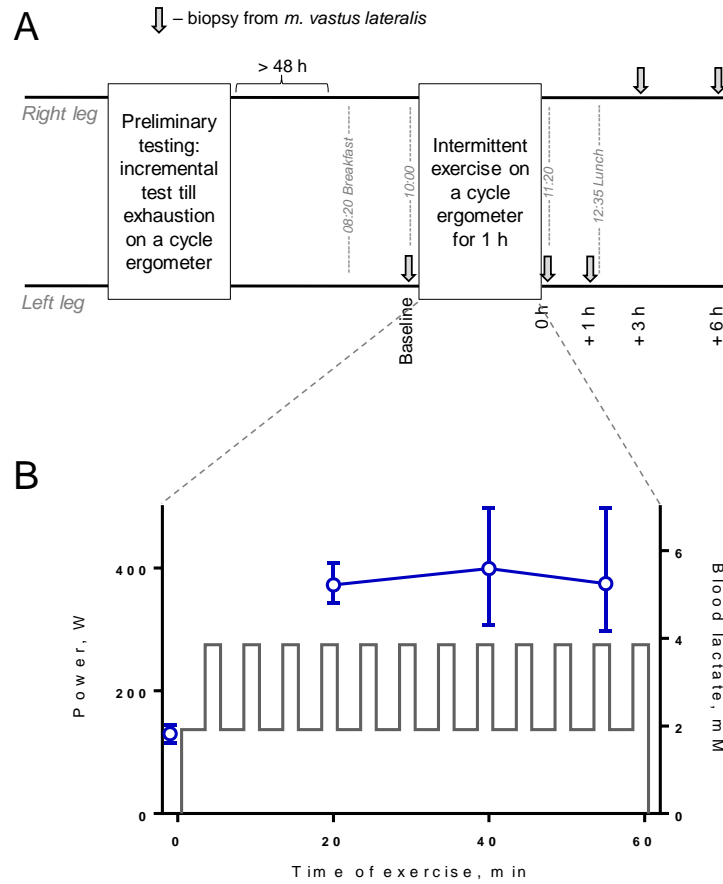

**Figure S1.** Design of the study

**A.** Ten endurance-trained athletes carried out an intermittent exercise on a cycle ergometer. Intensity of exercise was selected based on an incremental cycling test till exhaustion. Biopsy samples were taken from the *m. vastus lateralis* prior to, 2 min, 1 h, 3 h, and 6 h after an intermittent exercise (1st, 2d, and 3d from the one leg, 4st and 5st from another leg). **B.** An intermittent exercise induced metabolic shift indicated by markedly elevated blood lactate concentration.

| Common name                               | GO Biological process                                                              | -log <sub>10</sub> P <sub>adj</sub> (Count) |          |          |
|-------------------------------------------|------------------------------------------------------------------------------------|---------------------------------------------|----------|----------|
|                                           |                                                                                    | 1 h                                         | 3 h      | 6 h      |
| Regulation of transcription               | Negative regulation of transcription from RNA polymerase II promoter               | 5.56(48)                                    | 1.55(49) | 2.17(28) |
|                                           | Positive regulation of transcription from RNA polymerase II promoter               | 6.31(60)                                    | 3.35(69) |          |
|                                           | Negative regulation of apoptotic process                                           | 2.34(29)                                    | 1.92(36) |          |
|                                           | Positive regulation of gene expression                                             | 2.51(21)                                    |          |          |
|                                           | Negative regulation of sequence-specific DNA binding transcription factor activity | 2.11(11)                                    |          |          |
|                                           | Transcription from RNA polymerase II promoter                                      | 1.63(28)                                    |          |          |
| Regulation of angiogenesis                | Positive regulation of cell differentiation                                        | 1.63(7)                                     |          |          |
|                                           | Protein stabilization                                                              | 1.62(15)                                    |          |          |
|                                           | Vasculogenesis                                                                     | 1.42(9)                                     |          |          |
|                                           | Positive regulation of angiogenesis                                                | 1.79(12)                                    | 3.45(18) |          |
|                                           | Response to unfolded protein                                                       | 1.61(9)                                     | 3.01(13) |          |
|                                           | Platelet aggregation                                                               |                                             | 3.35(11) |          |
|                                           | Positive regulation of cell migration                                              |                                             | 2.81(22) |          |
|                                           | Leukocyte migration                                                                |                                             | 1.92(16) |          |
|                                           | Positive regulation of cell proliferation                                          |                                             | 1.92(34) |          |
|                                           | Epithelial to mesenchymal transition                                               |                                             | 1.42(8)  |          |
|                                           | Positive regulation of pathway-restricted SMAD protein phosphorylation             |                                             | 1.42(8)  |          |
| Platelet degranulation                    | Platelet degranulation                                                             |                                             | 3.51(19) |          |
| Response to stimulus                      | Cellular response to mechanical stimulus                                           |                                             | 3.18(15) |          |
|                                           | Response to cold                                                                   |                                             | 1.42(8)  |          |
| Immune response                           | Immune response                                                                    | 1.67(18)                                    | 1.74(23) |          |
| Movement of cell or subcellular component | Movement of cell or subcellular component                                          |                                             | 1.72(13) |          |

**Figure S2.** GO enrichment analysis for biological processes induced by acute exercise

The heat map shows the P-value adjusted (P<sub>adj</sub>). Dark red and blue denotes the most significant GO terms for up. The count indicates the number of genes enriched into a term.

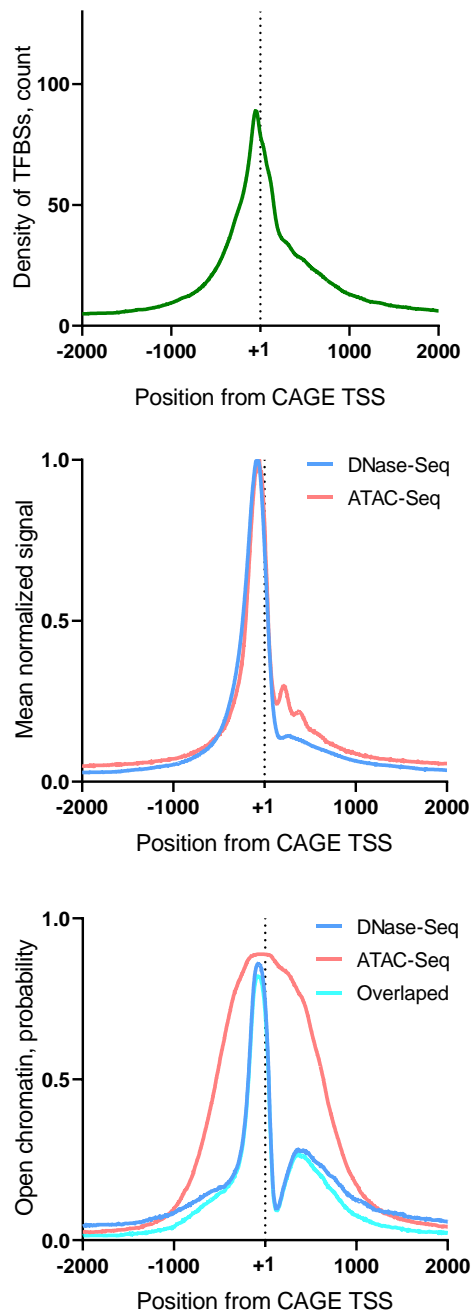

**Figure S3.** Distribution of nucleosome-depleted region markers around the CAGE TSS

The density of transcription factor binding sites (TFBSs) on the DNA (data from 15,982 ChIP-seq experiments; above), mean normalized DNase-seq and ATAC-seq signals (middle) and probability of open chromatin distribution (below) evaluated by normalized signals and MACS2 peaks for DNase-seq and ATAC-seq data, respectively (4 skeletal muscle samples).
